# Supplementary material for: COVID-19 outbreak among physicians at a Canadian curling bonspiel: a descriptive observational study
Source: PubMed Central journal article supplement — CMAJ Open. 2021 Feb 9;9(1):E87–95. doi: 10.9778/cmajo.20200115 (PMC8034378; doi:10.9778/cmajo.20200115), 2021-02-09

# SARS-CoV2 virus outbreak amongst physicians at a curling bonspiel in Canada: a retrospective cohort study

Kelly W. Burak, MD, MSc (Epid),<sup>1,2</sup> Sampson Law, MSc,<sup>2</sup> Chris M. Rice, MDes,<sup>2</sup> Jia Hu, MD, MSc,<sup>3</sup> Christopher I. Fung, MD,<sup>4</sup> Allan K.H. Woo, MD,<sup>5</sup> Bonnie L. Meatherall, MD, MSc.<sup>6</sup>

1. Division of Gastroenterology and Hepatology, Department of Medicine, Cumming School of Medicine, University of Calgary, Calgary, Alberta, Canada
2. Physician Learning Program, Continuing Medical Education and Professional Development, Cumming School of Medicine, University of Calgary, Calgary, Alberta, Canada
3. Medical Officer of Health, Alberta Health Services; Department of Community Health Sciences, Department of Medicine, Cumming School of Medicine, University of Calgary, Calgary, Alberta, Canada
4. Department of Radiology and Diagnostic Imaging, Faculty of Medicine and Dentistry, University of Alberta, Edmonton, Alberta, Canada
5. Division of Orthopedics, Department of Surgery, College of Medicine, University of Saskatchewan, Saskatoon, Saskatchewan, Canada
6. Division of Infectious Diseases, Department of Medicine, Cumming School of Medicine, University of Calgary, Calgary, Alberta, Canada

Corresponding Author:

Dr. Kelly W. Burak  
Associate Dean, Continuing Medical Education & Professional Development  
Co-Lead, Physician Learning Program  
Professor, Departments of Medicine and Oncology  
Cumming School of Medicine, University of Calgary

Rm GD42, TRW Bldg, 3280 Hospital Dr. NW  
Calgary, Alberta, Canada T2N 4Z6  
P: 4032202130  
F: 4032109247  
E: [kwburak@ucalgary.ca](mailto:kwburak@ucalgary.ca)  
T: @kwburak

Funding Statement:

This project was not directly funded, but received in-kind support from the Physician Learning Program.

Declaration of authors:

The authors have no competing interests to declare.

## ABSTRACT

### *Background*

Between March 11-14, 2020, 73 participants (56 healthcare workers) from four Canadian provinces attended a curling bonspiel in Edmonton, Alberta. Although precautions were taken, an outbreak of the severe acute respiratory syndrome coronavirus 2 (SARS-CoV2) occurred following the event.

### *Methods*

SARS-CoV2 testing was done according to provincial guidelines at the time. We used a standardized survey tool to interview consenting participants, collecting information on demographics, travel history, symptoms (type, onset, and duration) and clinical outcomes.

### *Results*

Of the 73 participants (75.3% male, median age 51 [range 26 – 79], 72.6% physicians), 40 curlers (54.8%) tested positive for SARS-CoV2 using reverse transcriptase polymerase chain reaction (RT-PCR) on nasal, nasopharyngeal or throat swabs. An additional 16 participants developed symptoms but had negative swabs or were not tested. Six false negative RT-PCR tests occurred on initial swabs (estimated sensitivity of 70.8%). The most common symptoms were nasal congestion / rhinorrhea (85%), cough (80%), myalgia (80%), anosmia (77.5%), and headache (62.5%). The clinical course was mild in the majority of cases (1 emergency visit, no hospitalizations). Careful analysis points to transmission from multiple individuals, who had minor non-specific symptoms during the event. Secondary transmission, in the home, occurred to 35 individuals.

### *Interpretation*

This represents one of the largest reported outbreaks amongst healthcare workers, although transmission was in the community. The 76.7% attack rate (confirmed or presumptive cases) highlights the infectivity of SARS-CoV2 during sporting and social events. Our data supports the inclusion of anosmia in an updated COVID-19 case definition.

## INTRODUCTION

Canada confirmed its first case of the novel coronavirus disease 2019 (COVID-19), a respiratory illness caused by the SARS-CoV2 virus, on January 25, 2020 (1). As of May 15, 2020, there have been more than 74,000 confirmed cases and more than 5,600 deaths in Canada (1). The World Health Organization declared a global pandemic on March 11, 2020, which was also the date that physicians from around Canada gathered for a curling bonspiel in Edmonton, Alberta. Curling is a winter sport that originated in Scotland, but today ninety percent of all curlers worldwide come from Canada (2). The 63<sup>rd</sup> Annual Western Canadian Medical Bonspiel took place between March 11–14, 2020, and at the onset of the event, there were only nineteen confirmed cases of COVID-19 in Alberta, including nine cases from Edmonton (*Supplementary Figure 1*). These cases were directly associated with international travel and no known community spread had been documented.

In early March, criteria for SARS-CoV2 testing in Canada was generally limited to symptomatic individuals (fever, cough or dyspnea) with history of international travel or close contact with a confirmed case. At the time, unusual symptoms of COVID-19, such as anosmia and diarrhea, were not well described in the scientific literature nor were they included in clinical case definitions used in Canada. Since the start of the pandemic, there has been great interest amongst healthcare workers about the risk of secondary transmission to household contacts, but this has yet to be well defined.

This community-based outbreak allowed us to study the following objectives:

- 1) Describe the onset, frequency and duration of the full spectrum of symptoms experienced by individuals with confirmed or suspected COVID-19.
- 2) Estimate the clinical sensitivity of SARS-CoV2 testing by RT-PCR of upper respiratory tract samples.

- 1  
2  
3 3) Describe the secondary transmission of SARS-CoV2 among close household contacts of  
4  
5 confirmed and suspected cases.  
6  
7  
8  
9

## 10 METHODS

### 11 *Study Population and Data Collection*

12 We conducted a retrospective cohort study of bonspiel participants. All 73 curlers consented to be  
13  
14 interviewed by telephone (KWB or BLM) between April 17 and May 5, 2020. Data collection included;  
15  
16 demographics, occupation, residence, travel history, bonspiel social activity participation, symptoms,  
17  
18 clinical outcomes and SARS-CoV2 testing results. We recorded duration of self-isolation, meetings or  
19  
20 patient encounters conducted prior to entering isolation, and awareness of transmission to family  
21  
22 members, co-workers or patients. Public health authorities in the Canadian provinces where participants  
23  
24 reside collected upper respiratory tract samples and tested for SARS-CoV2 by reverse transcriptase  
25  
26 polymerase chain reaction (RT-PCR) according to local protocols.  
27  
28  
29  
30  
31  
32  
33  
34

### 35 *Case Definitions*

36 Symptomatic participants were defined as “confirmed case” if they had laboratory-confirmed results for  
37  
38 SARS-CoV2 using RT-PCR of upper respiratory tract samples (nasal, nasopharyngeal or throat), at any  
39  
40 point during the course of their symptoms. Participants with symptoms who tested negative, or who  
41  
42 were not tested, were categorized as either a “presumptive case” or “non-specific case” by consensus  
43  
44 amongst authors. As anosmia is recognized as a strong indicator of SARS-CoV2 positivity, cases with loss  
45  
46 of smell were categorized as presumptive cases (3).  
47  
48  
49  
50  
51

### 52 *Analysis and statistics*

1  
2  
3 Continuous variables were summarized and results reported as median and interquartile range, while  
4 categorical variables were summarized as counts and percentages. Pearson chi-squared test was used to  
5 compare the proportions of symptomatic and asymptomatic groups attending various social events.  
6  
7 Comparison of non-normally distributed data was done using the Kruskal Wallis test and pairwise  
8 comparisons using the Mann-Whitney U tests. Analysis was performed using SPSS™ version 26 (IBM  
9 Corporation).

### 10 11 12 13 14 15 16 17 18 19 *Ethics*

20  
21 This study was approved by Conjoint Health Research Ethics Board at the University of Calgary (Ethics  
22 ID:REB20-0514). Subjects received a copy of the consent form by email and provided verbal consent by  
23 phone.  
24  
25  
26  
27  
28  
29

### 30 RESULTS

31  
32 Table 1 summarizes the demographic details of the bonspiel participants. Of the 73 curlers, 59 are  
33 physicians. The median age was 51, with one-quarter being above the age of 60, and the majority  
34 (75.3%) were male. Twenty-seven participants (37%) reported international travel in the 28 days  
35 preceding the bonspiel, with travel to USA being the most common destination. Interestingly, a higher of  
36 proportion of travel was seen amongst asymptomatic subjects (47.2% vs 35.7%), although this was not  
37 statistically significant ( $p=0.326$ ).  
38  
39  
40  
41  
42  
43  
44  
45  
46  
47

48 Fifty-six participants developed symptoms, 40 (54.8%) ultimately tested positive for SARS-CoV2 by RT-  
49 PCR. Eight of the 11 presumptive cases and all five of the non-specific cases were tested and found to be  
50 negative. Six of 17 participants who did not develop symptoms were tested and found to be negative  
51 (Figure 1). Non-specific symptomatic cases had shorter median duration of symptoms (3 days, IQR 2.8-  
52  
53  
54  
55  
56  
57  
58  
59  
60

1  
2  
3 6.5) compared to presumptive cases (16 days, IQR 11.8-27) and confirmed cases (11 days, IQR 7-15.3;  
4  
5  $p < 0.002$ ) (*Supplemental Figure 2*). Among confirmed cases, six individuals initially tested negative (4  
6  
7 negative, 2 indeterminate) but tested positive on repeat testing within a median of 3 days (IQR 1.5-5.3)  
8  
9 of initial test. The estimated sensitivity of SARS-CoV2 testing by RT-PCR of upper respiratory tract  
10  
11 samples is therefore 70.8%, based on the initial testing results of symptomatic individuals in this cohort.  
12  
13  
14  
15

16  
17 The most common symptoms described among confirmed and presumptive COVID-19 positive cases  
18  
19 were nasal congestion/rhinorrhea (82.4%), cough (76.5%), myalgia (74.5%), anosmia with aguesia (loss  
20  
21 of taste)/dysguesia (altered taste) (74.5%), and headache (62.7%) (Figure 2). Fatigue and exhaustion  
22  
23 were common (62.7%), and were reported more commonly in presumptive cases. Fever was only seen  
24  
25 in 50% of confirmed cases and was less commonly seen in presumptive cases, in which chills was more  
26  
27 common. Sore throat was seen (45.1%) and in total 70.6% had gastrointestinal symptoms (including  
28  
29 anorexia, diarrhea, nausea, abdominal pain and dyspepsia).  
30  
31  
32  
33

34  
35 Some symptoms including night sweats, productive cough, dyspnea and gastrointestinal symptoms  
36  
37 tended to occur later in the course (Figure 3). Anosmia was reported by 32 cases, and was associated  
38  
39 with aguesia or dysguesia in the majority (75%). In one confirmed positive case, anosmia was the only  
40  
41 symptom. Although anosmia could be present at onset of illness, the median onset was at 4 days (IQR 2-  
42  
43 5.3). At the time of data collection, all but four cases had fully recovered their sense of smell.  
44  
45  
46  
47

48  
49 Fortunately, the clinical course was mild for most. Symptomatic cases reported use of acetaminophen  
50  
51 (60.7%), non-steroidal anti-inflammatories (23.2%), and decongestants (17.9%), but no use of  
52  
53 experimental therapies. Only three individuals (5.9%) formally sought advice from a physician. One  
54  
55  
56  
57  
58  
59  
60

1  
2  
3 subject was assessed in the emergency department, where chest X-ray was normal and blood work  
4 demonstrated only mild lymphopenia. No participants were hospitalized and there was no mortality.  
5  
6  
7

8  
9  
10 Three days after conclusion of the event, we became aware of the first confirmed positive case, leading  
11 to the isolation of all curlers within 72 hours (Figure 4). The median isolation for symptomatic curlers  
12 was 17 days (range 10-30). In a few cases, symptoms of fatigue or intermittent dry cough (possibly post-  
13 viral) persisted for several weeks, beyond the end of isolation.  
14  
15  
16  
17  
18

19  
20  
21 From the beginning of the event, the median time to symptom onset was 6 days (IQR 4.5-8), consistent  
22 with the known incubation period of SARS-CoV2. In retrospect, ten participants identified that they had  
23 mild symptoms during the bonspiel (Figure 4). None of these individuals had symptoms consistent with  
24 the clinical case definition at the time and only three had travelled internationally prior to the event.  
25  
26  
27  
28  
29  
30 These individuals reported mild, non-specific symptoms, including fatigue, myalgia, sore throat, nasal  
31 congestion, rhinorrhea, diarrhea, and indigestion and only two curlers reported mild cough. Two curlers  
32 withdrew from the event after the first day, and one did not participate on the final day because of their  
33 mild symptoms.  
34  
35  
36  
37  
38  
39  
40

41 Four curlers developed symptoms more than 14 days after the onset of event (Figure 4). Three of these  
42 curlers were spouses of other confirmed cases, indicating possible secondary transmission in the home.  
43  
44  
45  
46 Participants reported that 35 family members also developed symptoms consistent with COVID-19 (12  
47 tested positive), of which only three were present at the bonspiel. Forty (54.8%) bonspiel participants  
48 reported having meetings or seeing patients before entering isolation and six (9.2%) reported being  
49 aware of a co-worker or patient subsequently testing positive for COVID-19.  
50  
51  
52  
53  
54  
55  
56  
57  
58  
59  
60

1  
2  
3 An analysis of social events at the bonspiel (Table 1), highlighted a significantly greater proportion of  
4 symptomatic cases attended the buffet style lunches at the curling rink (98.2% vs. 70.6%;  $p=0.002$ ).  
5  
6 Specifically, confirmed and presumptive cases were more likely to have attended the lunches than those  
7  
8 with non-specific or no symptoms (98.0% vs. 77.3%;  $p=0.003$ ).  
9  
10

#### 14 INTERPRETATION

15  
16 Seventeen of 18 teams who participated in the bonspiel had at least one confirmed case of COVID-19,  
17  
18 with one team having all four members affected. Our high attack rate (76.7% of curlers were confirmed  
19  
20 or presumptive cases), highlights the infectivity of SARS-CoV2 during sporting and social events. At the  
21  
22 time of the event, public health officials had recommended gathering should be restricted to fewer than  
23  
24 250 individuals. During the event, we took precautions including not shaking hands and disinfecting the  
25  
26 curling stones between games. However, our analysis suggests that attending buffet lunches may have  
27  
28 been important for transmission. These findings are particularly relevant as we begin to ease physical  
29  
30 distancing restrictions.  
31  
32  
33  
34  
35  
36

37 Our study represents one of the largest single outbreak events documented amongst physicians, and  
38  
39 highlights that community transmission can be an important mode of infection in healthcare workers  
40  
41 (HCWs). A recent analysis of occupational risk in Alberta, found the overall risk amongst HCWs to be  
42  
43 0.14% compared with 0.1% risk in the community (absolute occupational risk of 0.01%), with 20 of 22  
44  
45 cases of COVID-19 amongst Alberta physicians being related to this bonspiel (4). HCWs worry about the  
46  
47 risk of transmitting SARS-CoV2 to their family members (5), and in our study symptomatic curlers  
48  
49 reported that 35 family members developed symptoms of COVID-19 with 12 confirmed positive by RT-  
50  
51 PCR. This appears higher than the secondary clinical attack rate of 4.6% (95%CI, 2.3%-9.3%) reported  
52  
53 among 151 household contacts in a study from Taiwan (6).  
54  
55  
56  
57  
58  
59  
60



1  
2  
3  
4  
5 Eligibility criteria for SARS-CoV2 testing varied by Canadian province and evolved over time during the  
6  
7 early days of the pandemic. In mid to late March, clinical criteria (fever or cough or dyspnea) and a risk  
8  
9 factor (contact with a known or suspected COVID-19 case or return from international travel within 14  
10  
11 days) were required in most jurisdictions to qualify for testing. As one early case in our cohort was  
12  
13 eligible for immediate testing and promptly received a positive result, we were able to self-isolate and  
14  
15 expedite testing for other participants. More than half of bonspiel participants reported having meetings  
16  
17 or seeing patients before entering isolation, but only six (9.2%) reported being aware of a co-worker or  
18  
19 patient subsequently testing positive for COVID-19. Our early access to testing, and the rapidly reporting  
20  
21 of results, likely prevented the secondary spread of SARS-CoV2 during our outbreak.  
22  
23  
24  
25  
26  
27

28 Our confirmed cases reported cough (80%), fever (50%), and dyspnea (30%) at any time during their  
29  
30 illness; however, 19.6% never had any of these symptoms. Based on our analysis, the clinical spectrum  
31  
32 of COVID-19 varies widely from person to person and includes influenza like illness (ILI) symptoms, but  
33  
34 also atypical symptoms such as anosmia, noted in over three-quarters of our confirmed or presumed cases.  
35  
36 A recent systematic review and meta-analysis of ten studies (n= 1627) demonstrated olfactory  
37  
38 dysfunction in 52.7% (95%CI: 29.6%-75.2%) of COVID-19 patients (7). Another study of 803 HCWs from  
39  
40 the Netherlands with mild symptoms (90 positive for SARS-CoV2) found that anosmia was the most  
41  
42 important symptom in a predictive model to diagnose SARS-CoV2 (3). Our study, demonstrates that  
43  
44 anosmia tends to occur a few days after onset of other symptoms (Figure 3), but it can occur without  
45  
46 other symptoms such as nasal congestion or rhinorrhea in 15.7% of patients. In fact, anosmia was the  
47  
48 only symptom for one of our confirmed cases.  
49  
50  
51  
52  
53  
54  
55  
56  
57  
58  
59  
60

1  
2  
3 As we continue to learn more about this novel pathogen, it is important to recognize and consider  
4 atypical symptoms as part of the expanding clinical case definition of COVID-19 (Table 2). On April 27,  
5 2020, the Center for Disease Control (CDC) added additional symptoms to qualify individuals for SARS-  
6 CoV-2 testing. Similarly, on May 4, 2020, Alberta Public Health officials expanded the list of symptoms.  
7  
8 Our data supports this expanded case definition list and we encourage the Public Health Agency of  
9  
10  
11  
12  
13  
14  
15  
16  
17  
18  
19  
20  
21  
22  
23  
24  
25  
26  
27  
28  
29  
30  
31  
32  
33  
34  
35  
36  
37  
38  
39  
40  
41  
42  
43  
44  
45  
46  
47  
48  
49  
50  
51  
52  
53  
54  
55  
56  
57  
58  
59  
60

The sensitivity of initial SARS-CoV2 RT-PCR testing in our cohort is estimated to be 70.8%, which is consistent with a 60-70% sensitivity of a single nasopharyngeal or pharyngeal swab reported in the literature (8,9). The accuracy of nucleic acid tests is likely affected by a number of factors including lack of a reference standard, variable collection technique, type of swab used and variable viral shedding at different time points (10). Our false negative results were obtained from nasal swabs (4 cases) or nasal and throat swabs together (2 cases). Results of nucleic acid testing obtained from the upper respiratory tract must be interpreted in the context of symptoms and clinical suspicion (pre-test probability). Given the limitations of current nucleic acid based testing strategies, there is worldwide interest in developing serologic assays in the hope of better understanding the true epidemiology of this novel coronavirus in the community. However, a number of questions regarding the usefulness of serologic assays, including the specificity for SARS-CoV-2 with respect to other known coronaviruses, as well as the durability of protection provided by IgG immune response (11).

The next phase of this study will examine serology in all bonspiel participants to compare to our clinical definitions and RT-PCR testing. Our data suggests there may have been more than one introduction event into this cohort rather than a single index case. However, this is difficult to confirm based on only

1  
2  
3 epidemiologic methodology. To explore the transmission dynamics SARS-CoV2 infection in this  
4  
5 community-based outbreak, we hope to perform phylogenetic analysis of the positive samples.  
6  
7  
8  
9

10 Our study has limitations. RT-PCR testing was not available for all symptomatic participants. No “gold  
11  
12 standard” test is currently available to confirm SARS-CoV2 infection; as such, we used a clinical case  
13  
14 definition in this study. As many symptoms of SARS-CoV2 infection are similar to other ILI, the use of a  
15  
16 clinical case definition may not be entirely accurate. We recognize that the retrospective nature of data  
17  
18 collection may have been influenced by emerging reports of atypical symptoms, and we did not use a  
19  
20 validated test of anosmia. Complete public health contact tracing data of each participant was not  
21  
22 available to the study team for comparison. Therefore, the estimate of possible secondary spread of  
23  
24 SARS-CoV2 to close contacts outside of the bonspiel cohort may be an underestimate.  
25  
26  
27  
28  
29

### 30 CONCLUSIONS

31  
32 This study describes the variable clinical presentation of COVID-19 among a group of healthcare  
33  
34 providers in a community setting. In addition to fever, cough and dyspnea, unusual symptoms such as  
35  
36 anosmia are common and should be included in clinical case definition of COVID-19. It highlights how  
37  
38 quickly SARS-CoV2 can spread between asymptomatic or pauci-symptomatic individuals gathering for  
39  
40 social or sporting events. Due to the limited sensitivity of RT-PCR testing from upper respiratory tract  
41  
42 samples, it is important to isolate all symptomatic individuals, particularly in a health care setting, to  
43  
44 prevent further spread of SARS-CoV2.  
45  
46  
47  
48  
49  
50  
51  
52  
53  
54  
55  
56  
57  
58  
59  
60

## REFERENCES

1. Government of Canada. Epidemiological summary of COVID-19 cases in Canada. (<https://health-infobase.canada.ca/covid-19/epidemiological-summary-covid-19-cases.html>) [accessed May 12, 2020]
2. Curling Canada. The history of curling in Canada. (<http://brand.curling.ca>) [accessed May 12, 2020]
3. Tostmann A, Bradley J, Bousema T, et al. Strong associations and moderate predictive value of early symptoms for SARS-CoV-2 test positivity among healthcare workers, the Netherlands, March 2020. *Euro Surveill* 2020; 25(16). doi:10.2807/1560-7917.ES.2020.25.16.2000508.
4. COVID-19 Scientific Advisory Group. Rapid Response Report: Are healthcare workers at increased risk of COVID-19? (<https://www.albertahealthservices.ca/assets/info/ppih/if-ppih-covid-19-hcw-risk-rapid-review.pdf>) [accessed May 12, 2020]
5. Souadka A, Essangri H, Benkabbou A, Amrani L, Majbar MA. COVID-19 and Healthcare worker's families: behind the scenes of frontline response. *E Clinical Medicine* May 2020; doi:10.1016/j.eclinm.2020.100373
6. Cheng HY, Jian SW, Liu DP, et al. Contact Tracing Assessment of COVID-19 Transmission Dynamics in Taiwan and Risk at Different Exposure Periods Before and After Symptom Onset. *JAMA Int Med* 2020; doi:10.1001/jamainternmed.2020.2020
7. Tong JY, Wong A, Zhu D, Fastenberg JH, Tham T. The prevalence of olfactory and gustatory dysfunction in COVID-19 Patients: A Systematic Review and Meta-analysis. *Otolaryngol Head Neck Surg* 2020; doi:10.1177/0194599820926473. [Epub ahead of print 5 May 2020]
8. Wang W, Xu Y, Gao Ret al. Detection of SARS-CoV-2 in Different Types of Clinical Specimens *JAMA* 2020; 323(18):1843-1844.

- 1  
2  
3 9. Yang Y, Yang M, Shen C, et al. Evaluating the accuracy of different respiratory specimens in the  
4 laboratory diagnosis and monitoring the viral shedding of 2019-nCoV infections 2020. medRxiv  
5 doi:10.1101/2020.02.11.20021493  
6  
7  
8  
9  
10 10. Cheng M, Papenburg J, et al. Diagnostic Testing for Severe Acute Respiratory Syndrome–Related  
11 Coronavirus-2: A Narrative Review. *Ann Intern Med* Apr 2020; doi:10.7326/M20-1301 [Epub  
12 ahead of print 13 April 2020].  
13  
14  
15  
16 11. Theel E, Slev P, Wheeler S, Couturier MR, Wong SJ, Kadkhoda, K. The role of antibody testing for  
17 SARS-CoV-2: Is there one? *J Clin Microbiol* 2020, JCM.00797-20; doi:10.1128/JCM.00797-20  
18  
19  
20  
21  
22  
23  
24  
25  
26  
27  
28  
29  
30  
31  
32  
33  
34  
35  
36  
37  
38  
39  
40  
41  
42  
43  
44  
45  
46  
47  
48  
49  
50  
51  
52  
53  
54  
55  
56  
57  
58  
59  
60

Confidential

## TABLES

**TABLE 1. Clinical characteristics of participants according to symptoms.**

| Characteristics                                  | All Participants<br>(N = 73) | Symptomatic<br>(N = 56) | Asymptomatic<br>(N = 17) | p-value      |
|--------------------------------------------------|------------------------------|-------------------------|--------------------------|--------------|
| Median age (IQR range) – years                   | 51 (39 – 60)                 | 51 (39 – 60)            | 54 (49 – 68)             |              |
| Age distribution – no. (%)                       |                              |                         |                          |              |
| 20-29 years                                      | 4 (5.5)                      | 3 (5.4)                 | 1 (5.9)                  |              |
| 30-39 years                                      | 18 (24.7)                    | 16 (28.6)               | 2 (11.8)                 |              |
| 40-49 years                                      | 9 (12.3)                     | 7 (12.5)                | 2 (11.8)                 |              |
| 50-59 years                                      | 23 (31.5)                    | 18 (32.1)               | 5 (29.4)                 |              |
| 60-69 years                                      | 14 (19.2)                    | 10 (17.9)               | 4 (23.5)                 |              |
| 70-79 years                                      | 5 (6.8)                      | 2 (3.6)                 | 3 (17.6)                 |              |
| Female sex – no. (%)                             | 18 (24.7)                    | 15 (26.8)               | 3 (17.6)                 |              |
| Occupation – no. (%)                             |                              |                         |                          |              |
| Physician                                        | 53 (72.6)                    | 42 (75)                 | 11 (64.7)                |              |
| Other health care worker                         | 3 (4.1)                      | 3 (5.4)                 | 0 (0)                    |              |
| Other                                            | 17 (23.3)                    | 11 (19.6)               | 6 (35.3)                 |              |
| Residence – no. (%)                              |                              |                         |                          |              |
| Alberta                                          | 46 (63)                      | 36 (64.3)               | 11 (58.8)                |              |
| Saskatchewan                                     | 20 (27.4)                    | 14 (25)                 | 6 (35.3)                 |              |
| Ontario                                          | 4 (5.5)                      | 3 (5.4)                 | 1 (5.9)                  |              |
| Manitoba                                         | 3 (4.1)                      | 3 (5.4)                 | 0 (0)                    |              |
| International travel within 4 weeks – no. (%)    |                              |                         |                          |              |
| Total                                            | 27 (37)                      | 19 (35.7)               | 8 (47.2)                 | 0.326        |
| USA                                              | 20 (27.4)                    | 13 (23.2)               | 7 (41.2)                 |              |
| Caribbean / Central America                      | 3 (4.1)                      | 2 (3.6)                 | 1 (5.9)                  |              |
| Africa                                           | 1 (1.4)                      | 1 (1.8)                 | 0 (0)                    |              |
| Asia                                             | 1 (1.4)                      | 1 (1.8)                 | 0 (0)                    |              |
| Europe                                           | 1 (1.4)                      | 1 (1.8)                 | 0 (0)                    |              |
| <b>Activities – no. (%)</b>                      |                              |                         |                          |              |
| Did you participate in the following activities? |                              |                         |                          |              |
| <b>Curling</b>                                   |                              |                         |                          |              |
| Thursday                                         | 71 (97.3)                    | 55 (98.2)               | 16 (94.1)                | 0.365        |
| Friday                                           | 68 (93.2)                    | 52 (92.9)               | 16 (94.1)                | 0.857        |
| Saturday                                         | 63 (80.1)                    | 51 (84)                 | 12 (70.6)                | 0.394        |
| <b>Social Events</b>                             |                              |                         |                          |              |
| Wednesday Evening Reception                      | 57 (78.1)                    | 45 (80.4)               | 12 (70.6)                | 0.395        |
| Thursday Evening Bowling                         | 34 (46.6)                    | 27 (48.2)               | 7 (41.2)                 | 0.610        |
| Saturday Evening Banquet                         | 46 (65.8)                    | 37 (66.1)               | 9 (52.9)                 | 0.326        |
| Hotel Breakfasts                                 | 48 (65.8)                    | 38 (67.9)               | 10 (58.8)                | 0.492        |
| Curling Rink Buffet Lunches                      | 67 (91.8)                    | 55 (98.2)               | 12 (70.6)                | <b>0.002</b> |

no. = number, IQR = interquartile range

**TABLE 2. Clinical Case Definition for COVID-19 Based on Symptoms**

| Health Canada                                                     | Alberta Public Health<br>(updated May 4, 2020)                                                                                                                                                                                                                                                                                                                                                                                                                                        | Center for Disease Control<br>(updated April 27, 2020)                                                                              |
|-------------------------------------------------------------------|---------------------------------------------------------------------------------------------------------------------------------------------------------------------------------------------------------------------------------------------------------------------------------------------------------------------------------------------------------------------------------------------------------------------------------------------------------------------------------------|-------------------------------------------------------------------------------------------------------------------------------------|
| Cough<br>Fever<br>Difficulty breathing<br>Pneumonia in both lungs | Cough (new cough or worsening chronic cough)<br>Fever<br>Shortness of breath or difficulty breathing (new or worsening)<br>Chills<br>Muscle or joint aches<br>Sore throat<br>Loss of sense of smell or taste<br>Runny nose<br>Stuffy nose<br>Painful swallowing<br>Headache<br>Feeling unwell in general, or new fatigue or severe exhaustion<br>Gastrointestinal symptoms (nausea, vomiting, diarrhea or unexplained loss of appetite)<br>Conjunctivitis, commonly known as pink eye | Cough<br>Fever<br>Shortness of breath or difficulty breathing<br>Chills<br>Muscle pain<br>Sore throat<br>New loss of taste or smell |

1  
2  
3  
4  
5  
6  
7  
8  
9  
10  
11  
12  
13  
14  
15  
16  
17  
18  
19  
20  
21  
22  
23  
24  
25  
26  
27  
28  
29  
30  
31  
32  
33  
34  
35  
36  
37  
38  
39  
40  
41  
42  
43  
44  
45  
46  
47  
48  
49  
50  
51  
52  
53  
54  
55  
56  
57  
58  
59  
60

FIGURE 1. Number of bonspiel participants with confirmed COVID-19 (swab positive), presumptive COVID-19 (swab negative or not done), other non-specific symptoms (swab negative), or no symptoms.

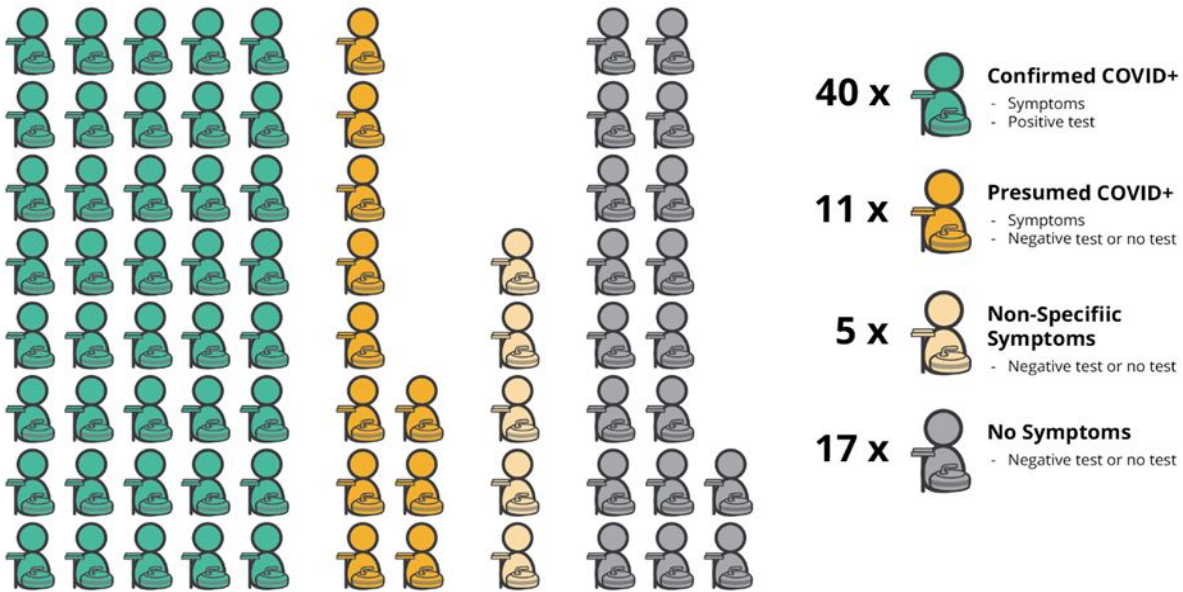

Confidential



FIGURE 2. Frequency of symptoms amongst confirmed COVID-19 (swab positive) and presumptive COVID-19 (swab negative or not done) cases.

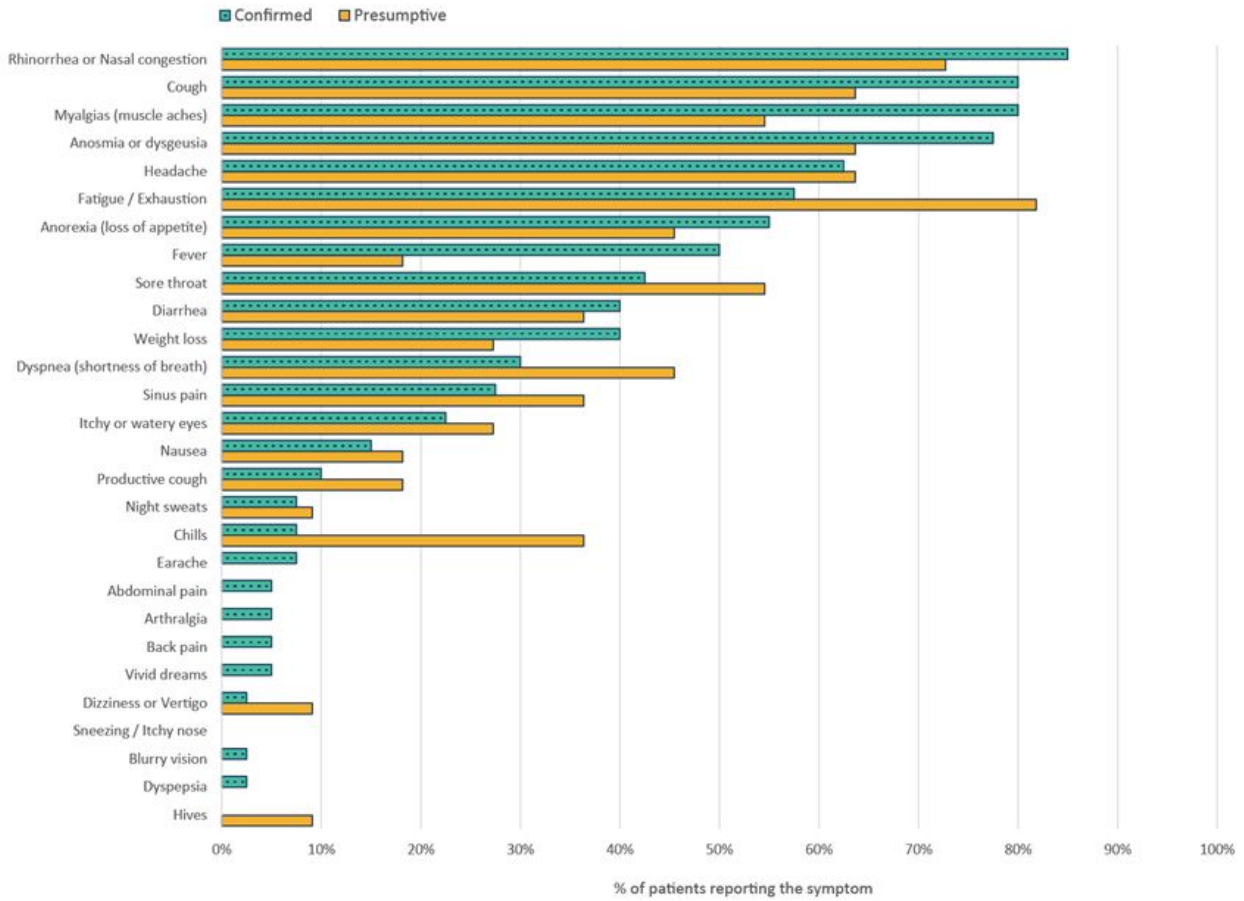

1  
2  
3  
4  
5  
6  
7  
8  
9  
10  
11  
12  
13  
14  
15  
16  
17  
18  
19  
20  
21  
22  
23  
24  
25  
26  
27  
28  
29  
30  
31  
32  
33  
34  
35  
36  
37  
38  
39  
40  
41  
42  
43  
44  
45  
46  
47  
48  
49  
50  
51  
52  
53  
54  
55  
56  
57  
58  
59  
60

FIGURE 3. The median onset of common symptoms amongst confirmed and presumptive COVID-19 cases. Dysgeusia (altered taste) includes 18 with aguesia (loss of taste). Box and whiskers plots show the median, interquartile ranges (IQR). Outliers within three times IQR are shown with open circles, and those outside by an asterisk (\*).

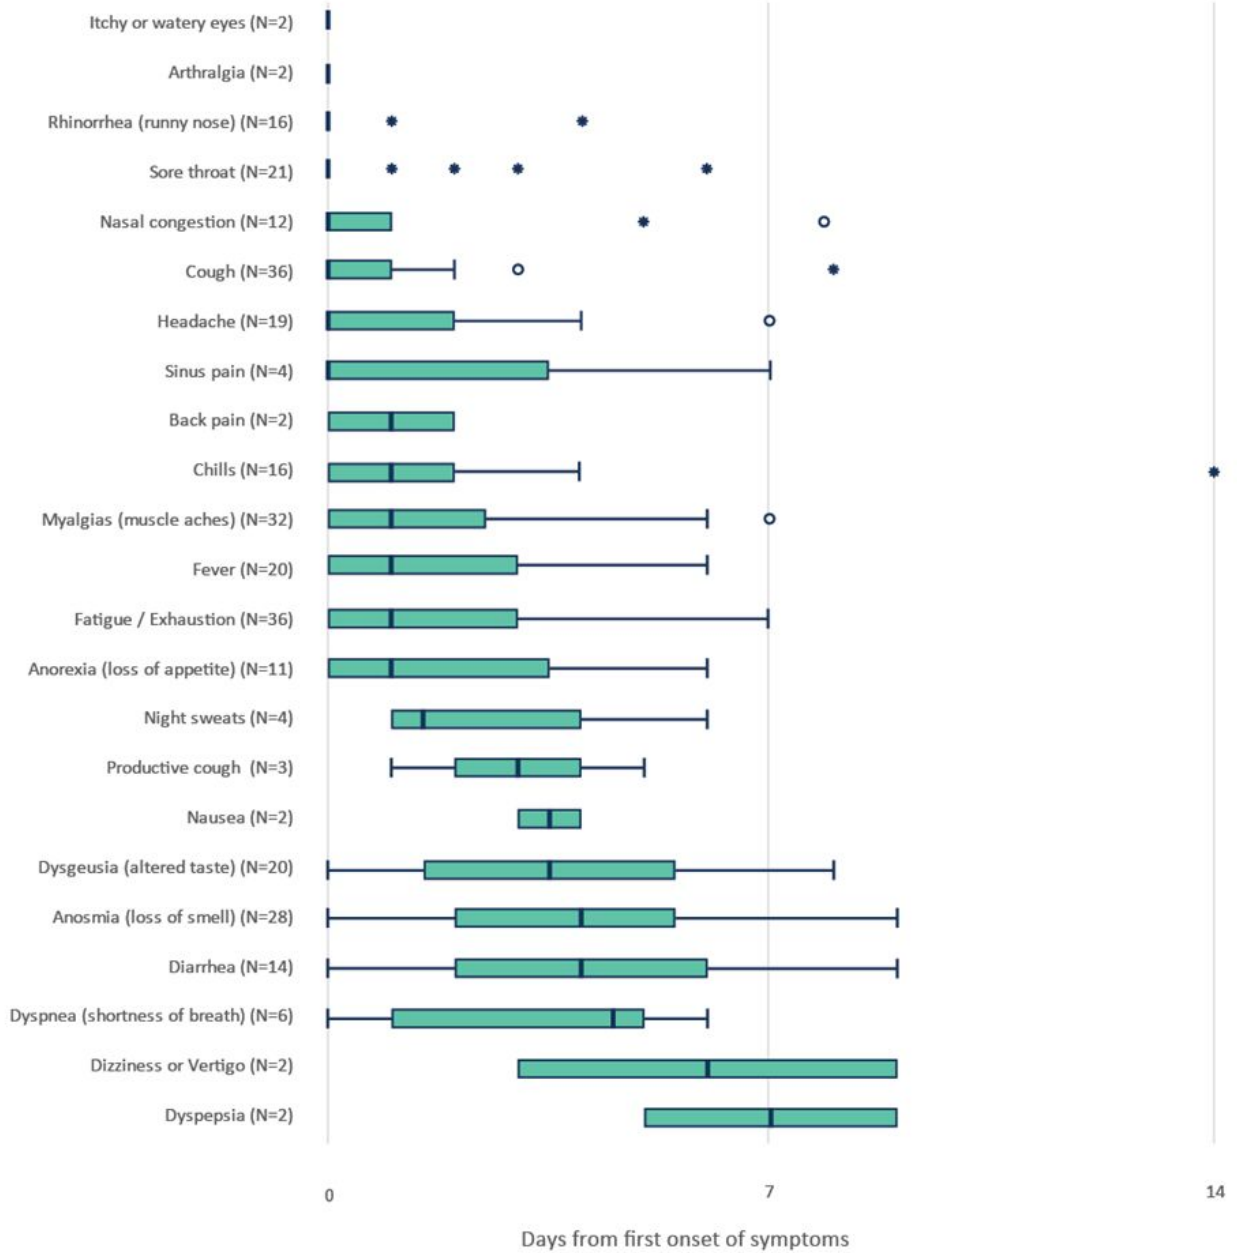

FIGURE 4. In relation to the event, the onset and duration of symptoms and isolation in confirmed COVID-19 (swab positive), presumptive COVID-19 (swab negative or not done), other non-specific symptoms (swab negative) cases.

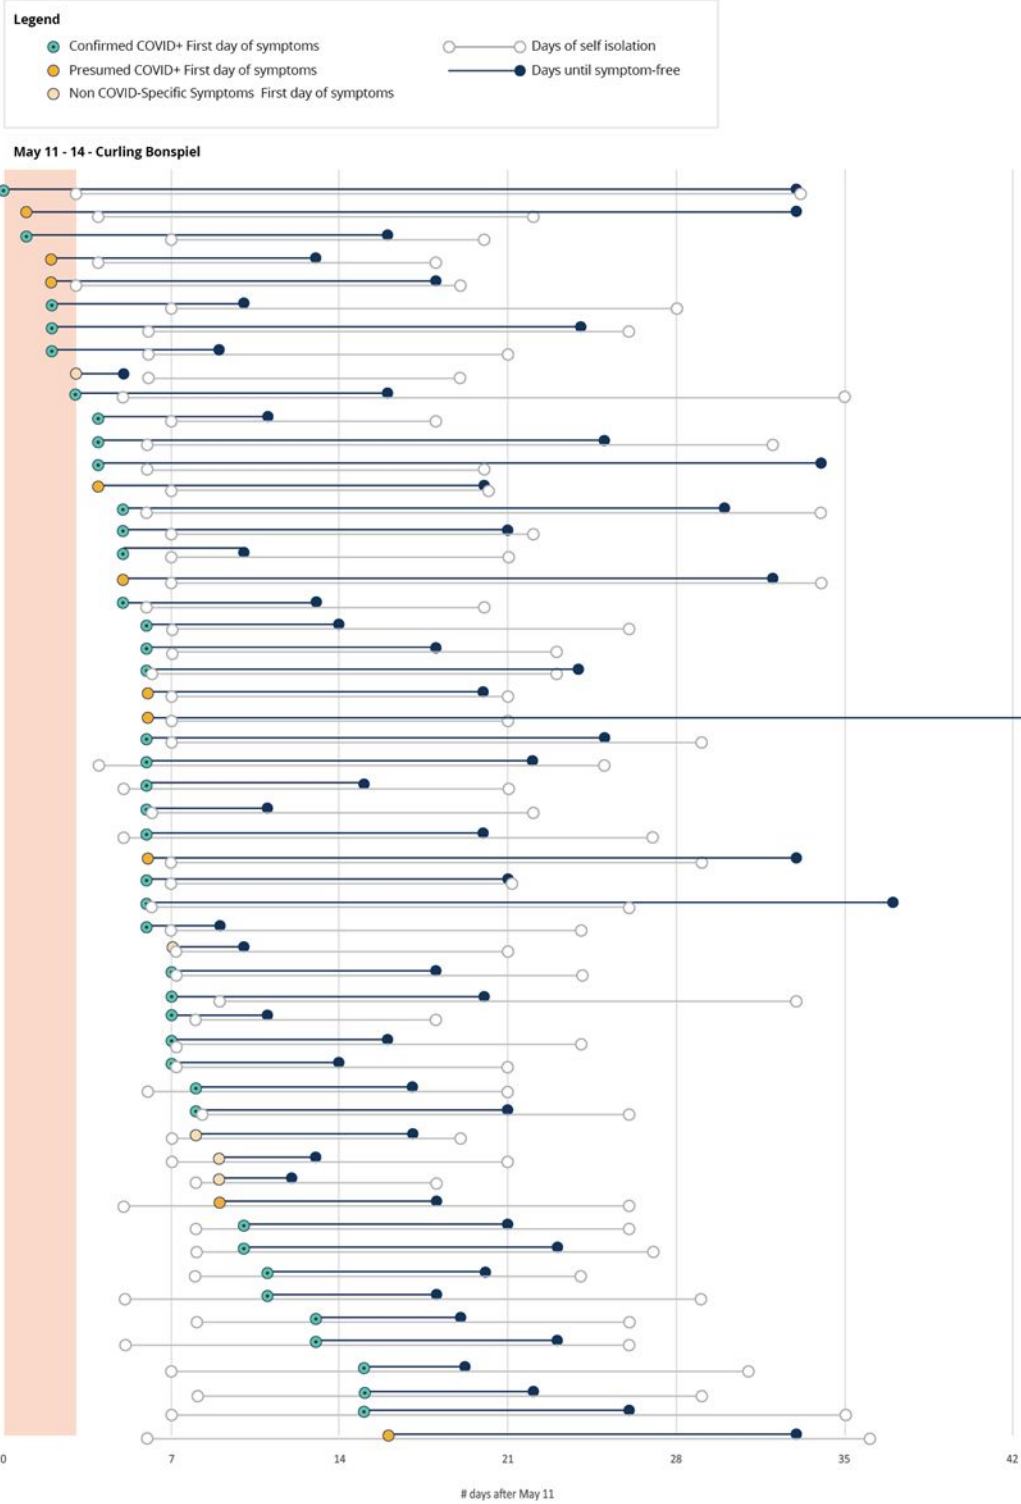

1  
2  
3  
4  
5  
6  
7  
8  
9  
10  
11  
12  
13  
14  
15  
16  
17  
18  
19  
20  
21  
22  
23  
24  
25  
26  
27  
28  
29  
30  
31  
32  
33  
34  
35  
36  
37  
38  
39  
40  
41  
42  
43  
44  
45  
46  
47  
48  
49  
50  
51  
52  
53  
54  
55  
56  
57  
58  
59  
60

SUPPLEMENTAL APPENDIX

FIGURE S1. COVID-19 Cases in Alberta, Canada. Image source: [www.CHI-CSM.ca](http://www.CHI-CSM.ca) [downloaded May 15, 2020].

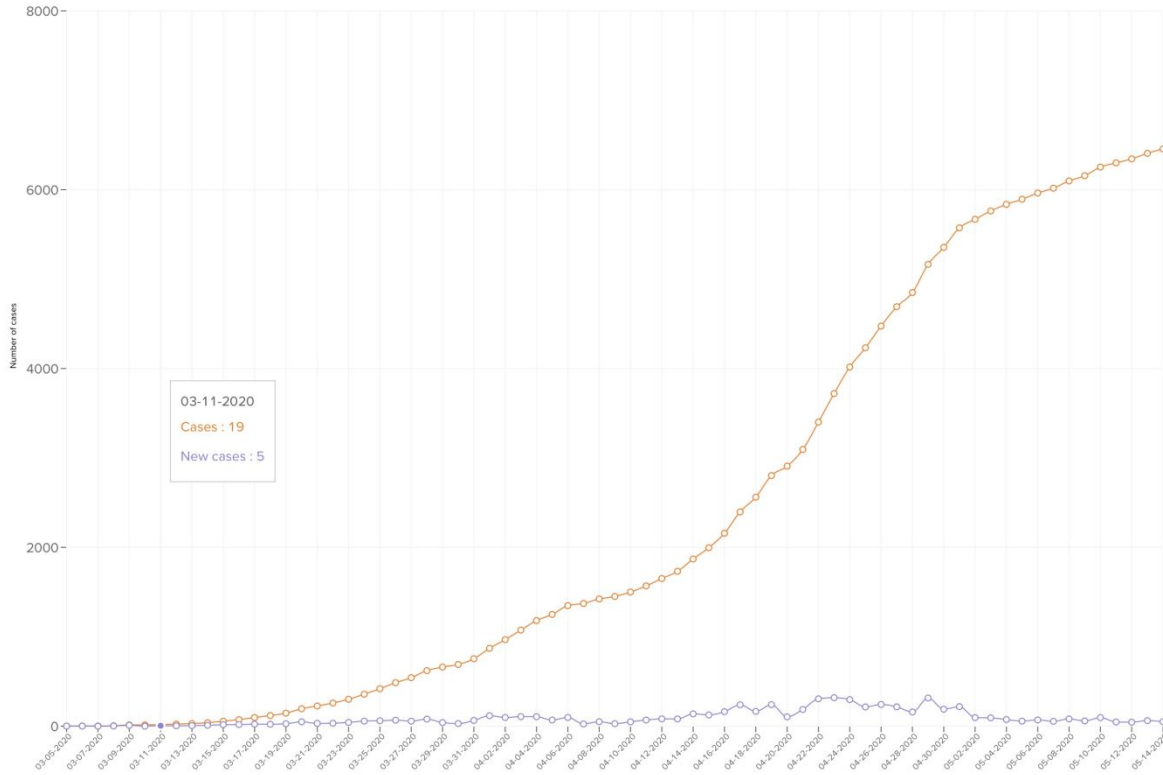

1  
2  
3  
4  
5  
6  
7  
8  
9  
10  
11  
12  
13  
14  
15  
16  
17  
18  
19  
20  
21  
22  
23  
24  
25  
26  
27  
28  
29  
30  
31  
32  
33  
34  
35  
36  
37  
38  
39  
40  
41  
42  
43  
44  
45  
46  
47  
48  
49  
50  
51  
52  
53  
54  
55  
56  
57  
58  
59  
60

FIGURE S2. The median duration patients experienced symptoms amongst confirmed and presumptive COVID-19 cases compared to those showing non-specific symptoms. Box and whiskers plots show the median, interquartile ranges (IQR). Outliers within three times IQR are shown with open circles, and those outside by an asterisk (\*). The median duration of symptoms was significantly affected by COVID-19 status ( $p < 0.002$ ), with those experiencing non-specific symptoms experiencing significantly shorter durations (3 days, IQR 2.8-6.5) compared to presumptive cases (16 days, IQR 11.8-27,  $p = 0.003$ ). Presumptive cases experienced symptoms for significantly longer than confirmed cases of COVID-19 (11 days, IQR 7-15.3;  $p = 0.036$ ).

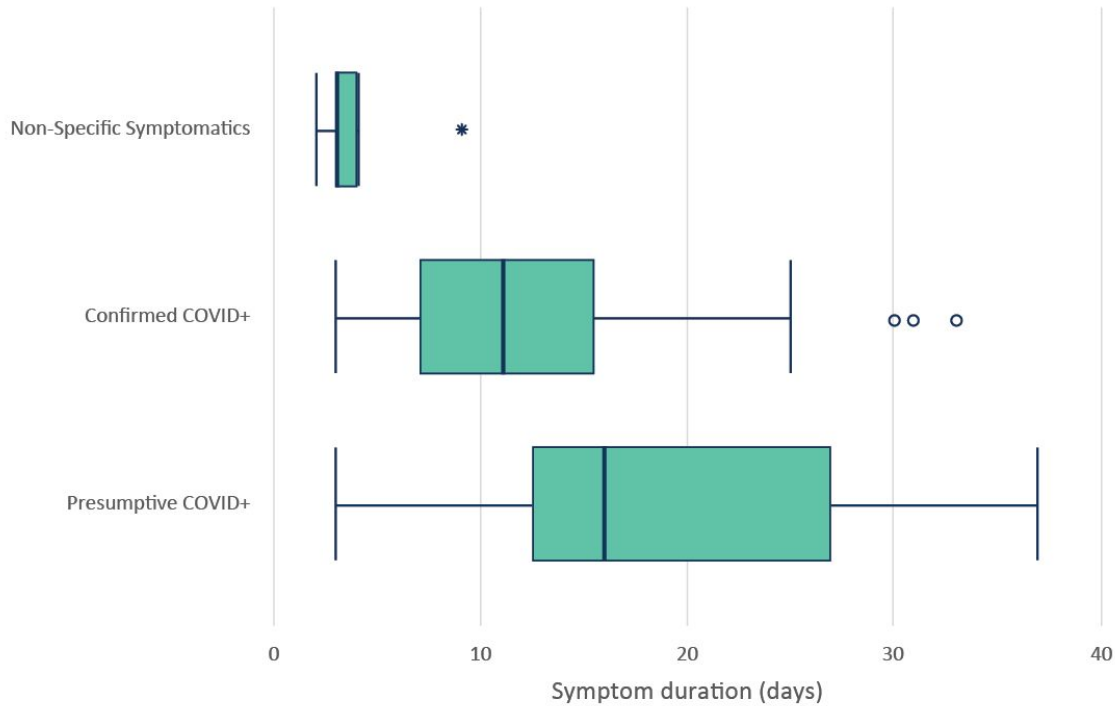

Supplement: supp_9.1.E87_2020-0115-original-submission.pdf [file supp_9.1.E87_2020-0115-original-submission.pdf]
