# Supplementary material for: COVID-19 outbreak among physicians at a Canadian curling bonspiel: a descriptive observational study
Source: PubMed Central journal article supplement — CMAJ Open. 2021 Feb 9;9(1):E87–95. doi: 10.9778/cmajo.20200115 (PMC8034378; doi:10.9778/cmajo.20200115), 2021-02-09
Supplement: supp_9.1.E87_2020-0115-1-at.pdf [file supp_9.1.E87_2020-0115-1-at.pdf]

**APPENDIX 1 (as supplied by the authors)**

Table of Contents

|                                                                                                                                                                                             |   |
|---------------------------------------------------------------------------------------------------------------------------------------------------------------------------------------------|---|
| 1. <i>Questionnaire for bonspiel participants</i> .....                                                                                                                                     | 2 |
| 2. <i>Supplementary Table 1</i> .....                                                                                                                                                       | 5 |
| Comparison of Public Health Agency of Canada (PHAC) and the World Health Organization (WHO) case definitions of suspect and probable COVID-19 cases. Adapted from references (11) and (12). |   |
| 3. <i>Supplementary Table 2</i> .....                                                                                                                                                       | 6 |
| Comparison of PHAC and WHO case definitions, and SARS-CoV-2 serology results, amongst 16 symptomatic individuals in which RT-PCR was negative or not done.                                  |   |

QUESTIONNAIRE

**Project Title:**

Transmission and Case Definition of a COVID-19 outbreak amongst healthcare workers at a curling bonspiel in Western Canada

**Consent:**

Have you reviewed the consent form and do you agree to participate in the study? Y / N

**Participant Survey Questions:**

**Demographics**

|             |                                                                                       |
|-------------|---------------------------------------------------------------------------------------|
| Age:        |                                                                                       |
| Gender:     |                                                                                       |
| City:       |                                                                                       |
| Employment: | Physician - Resident / Retired<br>Other Health Care Worker - Nurse / Dentist<br>Other |

**Did you attend? Y / N**

|                                |  |
|--------------------------------|--|
| Wednesday evening reception    |  |
| Thursday AM Breakfast at hotel |  |
| Thursday AM Curling            |  |
| Thursday Lunch at Rink         |  |
| Thursday PM Curling            |  |
| Thursday Bowling               |  |
| Thursday Dinner - with whom    |  |
| Friday AM Breakfast at hotel   |  |
| Friday AM Curling              |  |
| Friday Lunch at Rink           |  |
| Friday PM Curling              |  |
| Friday Dinner - with whom      |  |
| Saturday AM Breakfast at hotel |  |
| Saturday AM Curling            |  |
| Saturday Lunch at Rink         |  |
| Saturday PM Curling            |  |
| Saturday Banquet               |  |
| Sunday AM Breakfast at hotel   |  |

**Had you travelled outside Canada in the month before the Bonspiel (Feb 12-Mar 11)?**

**If yes, where and when?**

**Did you develop symptoms?** Y / N

**Date of onset of first symptoms?**

**Symptoms (Y / N)**

|                               |  |
|-------------------------------|--|
| Fever                         |  |
| Tmax (maximum temperature)    |  |
| Duration of fever in days     |  |
| Headache                      |  |
| Itchy or watery eyes          |  |
| Sinus pain                    |  |
| Nasal congestion              |  |
| Rhinorrhea (runny nose)       |  |
| Anosmia (loss of smell)       |  |
| Dysguesia (altered taste)     |  |
| Ageusia (loss of taste)       |  |
| Sore throat                   |  |
| Cough                         |  |
| Productive cough              |  |
| Dyspnea (Shortness of Breath) |  |
| Nausea                        |  |
| Anorexia (loss of appetite)   |  |
| Dyspepsia                     |  |
| Abdominal pain                |  |
| Diarrhea                      |  |
| Weight loss                   |  |
| Myalgia (muscle aches)        |  |
| Other symptoms (describe)     |  |

**Did you seek medical attention for your symptoms?** Family MD / Walk-in Clinic / ER

**Where you hospitalized?** Y / N (dates)

**Did you take any treatments?** Acetaminophen / NSAIDS / decongestants / cough suppressants / other (specify)

**Which symptoms came on first?**

**Describe the severity of symptoms (mild, moderate, severe) and progression of symptoms.**

**Date of complete symptom resolution?**

**Date of isolation:**

**Did you see patients or have meetings before isolation?**

**Did anyone in your home (not at the bonspiel) develop symptoms?**

**Was anyone you were in close contact with diagnosed with COVID-19?**

**Testing**

|                    |                                   |
|--------------------|-----------------------------------|
| <b>First Test</b>  |                                   |
| Date taken:        |                                   |
| Type:              | Nasal or Nasopharyngeal or Throat |
| Result:            | Positive or Negative              |
| Date reported:     |                                   |
| <b>Second Test</b> |                                   |
| Date taken:        |                                   |
| Type:              | Nasal or Nasopharyngeal or Throat |
| Result:            | Positive or Negative              |
| Date reported:     |                                   |
| <b>Third Test</b>  |                                   |
| Date taken:        |                                   |
| Type:              | Nasal or Nasopharyngeal or Throat |
| Result:            | Positive or Negative              |
| Date reported:     |                                   |
| <b>Fourth Test</b> |                                   |
| Date taken:        |                                   |
| Type:              | Nasal or Nasopharyngeal or Throat |
| Result:            | Positive or Negative              |
| Date reported:     |                                   |
| <b>Fifth Test</b>  |                                   |
| Date taken:        |                                   |
| Type:              | Nasal or Nasopharyngeal or Throat |
| Result:            | Positive or Negative              |
| Date reported:     |                                   |

**Duration of isolation:**

**Return to work date:**

**Any other comments:**

**Supplementary Table 1.** Comparison of Public Health Agency of Canada (PHAC) and the World Health Organization (WHO) case definitions of suspect and probable COVID-19 cases. Adapted from references (11) and (12).

| Definition    | Public Health Agency of Canada (PHAC)                                                                                                                                                                                                                                                                                                                                                                                                                                                 | World Health Organization (WHO)                                                                                                                                                                                                                                                                                                                                                                                                                                                                                                                                                                                                     |
|---------------|---------------------------------------------------------------------------------------------------------------------------------------------------------------------------------------------------------------------------------------------------------------------------------------------------------------------------------------------------------------------------------------------------------------------------------------------------------------------------------------|-------------------------------------------------------------------------------------------------------------------------------------------------------------------------------------------------------------------------------------------------------------------------------------------------------------------------------------------------------------------------------------------------------------------------------------------------------------------------------------------------------------------------------------------------------------------------------------------------------------------------------------|
| Suspect Case  | <p><b>TWO OR MORE</b> of:</p> <ul style="list-style-type: none"> <li>• <b>Fever</b> (signs of fever)</li> <li>• <b>Cough</b> (new or exacerbated chronic)</li> <li>• <b>Sore throat</b></li> <li>• <b>Runny nose</b></li> <li>• <b>Headache</b></li> </ul>                                                                                                                                                                                                                            | <p>Acute onset of <b>fever AND cough</b><br/> <b>OR</b> acute onset of <b>ANY THREE OR MORE</b> of:</p> <ul style="list-style-type: none"> <li>• <b>Fever</b></li> <li>• <b>Cough</b></li> <li>• <b>General weakness/fatigue</b></li> <li>• <b>Headache</b></li> <li>• <b>Myalgia</b></li> <li>• <b>Sore throat</b></li> <li>• <b>Coryza</b></li> <li>• <b>Dyspnea</b></li> <li>• <b>Anorexia/nausea/vomiting</b></li> <li>• <b>Diarrhea</b></li> <li>• <b>Altered mental status</b></li> </ul>                                                                                                                                     |
| Probable Case | <p><b>Fever</b> (over 38°C) <b>OR</b> new onset of (or exacerbation of chronic) <b>cough AND</b> who meets exposure criteria in whom a laboratory diagnosis is inconclusive</p> <p><b>OR</b></p> <p><b>Fever</b> (over 38°C) <b>OR</b> new onset of (or exacerbation of chronic) <b>cough AND</b> close contact with a confirmed case of COVID-19, or lived in or worked in a closed facility known to be experiencing an outbreak of COVID-19, who has not had a laboratory test</p> | <p>A) patient who meets clinical criteria above <b>AND</b> is a contact of a probable or confirmed case, or linked to a cluster with at least one confirmed case</p> <p>B) suspect case with chest imaging showing findings suggestive of COVID-19 disease</p> <p>C) person with recent onset of <b>anosmia</b> (loss of smell) or <b>ageusia</b> (loss of taste) in the absence of any other identified cause</p> <p>D) death, not otherwise explained, in an adult with respiratory distress preceding death <b>AND</b> was a contact of a probable or confirmed case or linked to a cluster with at least one confirmed case</p> |

**Supplementary Table 2.** Comparison of PHAC and WHO case definitions, and SARS-CoV-2 serology results, amongst 16 symptomatic individuals in which RT-PCR was negative or not done.

| Case | PHAC     | WHO      | Serology | Symptoms                                                                                                                  |
|------|----------|----------|----------|---------------------------------------------------------------------------------------------------------------------------|
| 1    | Probable | Probable | Positive | fever, cough, headache, myalgia, dyspnea, fatigue, anorexia, chills, weight loss                                          |
| 2    | Probable | Probable | Positive | fever, headache, fatigue, myalgia, dyspnea, anorexia, anosmia, dysgeusia, dizziness/vertigo, sinus pain                   |
| 3    | Probable | Probable | Positive | cough, sore throat, coryza, headache, fatigue, myalgia, anosmia, dysgeusia, itchy/watery eyes                             |
| 4    | Probable | Probable | Positive | cough, coryza, headache, fatigue, nausea, anosmia, dysgeusia, diarrhea, hives, itchy/watery eyes, sinus pain, weight loss |
| 5    | Probable | Probable | Positive | cough, coryza, sore throat, headache, fatigue, dyspnea, anosmia, dysgeusia, sinus pain                                    |
| 6    | Probable | Probable | Negative | cough, sore throat, headache, myalgia, anorexia, anosmia, dysgeusia, night sweats, chills                                 |
| 7    | Probable | Probable | Negative | cough (productive), sore throat, coryza, fatigue, myalgia, dyspnea, diarrhea, nausea, itchy/watery eyes                   |
| 8    | Probable | Probable | Negative | cough (productive), sore throat, coryza, dyspnea, anorexia, diarrhea, weight loss, chills                                 |
| 9    | Probable | Probable | Not done | cough, sore throat, coryza, anosmia, dysgeusia, itchy/watery eyes, sneezing/itchy nose                                    |
| 10   | Suspect  | Probable | Negative | coryza, headache, fatigue, myalgia, diarrhea, sinus pain                                                                  |
| 11   | Suspect  | Probable | Negative | sore throat, coryza, fatigue, anorexia, anosmia, dysgeusia                                                                |
| 12   | Non-case | Probable | Positive | coryza, fatigue, anosmia                                                                                                  |
| 13   | Non-case | Probable | Not done | headache, fatigue, anorexia/nausea                                                                                        |
| 14   | Probable | Non-case | Positive | cough, coryza                                                                                                             |
| 15   | Non-case | Non-case | Negative | myalgia, anorexia/nausea, night sweats                                                                                    |
| 16   | Non-case | Non-case | Negative | coryza                                                                                                                    |

**Symptoms** = Both on PHAC and WHO list (red), only on WHO list (blue) with anosmia automatically becoming WHO probable case, and other symptoms not on PHAC or WHO list (black)
